# Supplementary material for: The Effect of Dietary Protein Imbalance during Pregnancy on the Growth, Metabolism and Circulatory Metabolome of Neonatal and Weaned Juvenile Porcine Offspring
Source: MDPI journal article supplement (doi:10.3390/nu13093286), 2021-09-20

**Supplementary Table S1.** Excluded metabolites from targeted analysis

| Metabolite class | Metabolite Species | Exclusion <sup>1</sup> | Metabolite class     | Metabolite Species | Exclusion <sup>1</sup> |
|------------------|--------------------|------------------------|----------------------|--------------------|------------------------|
| Acylcarnitines   | C10                | < LLOQ                 | Biogenic amines      | c4-OH-Pro          | < LOD                  |
|                  | C10:1              | < LOD                  |                      | DOPA               | < LOD                  |
|                  | C10:2              | < LOD                  |                      | Dopamine           | < LOD                  |
|                  | C12                | < LOD                  |                      | Histamine          | < LOD                  |
|                  | C12-DC             | < LOD                  |                      | Met-SO             | < LOD                  |
|                  | C12:1              | < LOD                  |                      | Nitro-Tyr          | < LOD                  |
|                  | C14                | < LOD                  |                      | PEA                | < LOD                  |
|                  | C16-OH             | < LOD                  |                      | Serotonin          | < LLOQ                 |
|                  | C16:1              | < LOD                  |                      | Spermine           | < LLOQ                 |
|                  | C16:1-OH           | < LOD                  |                      | Total DMA          | < LLOQ                 |
|                  | C16:2              | < LOD                  | Glycerophospholipids | LysoPC a C14:0     | < LOD                  |
|                  | C16:2-OH           | < LOD                  |                      | LysoPC a C24:0     | < LOD                  |
|                  | C18                | < LLOQ                 |                      | PC aa C26:0        | < LOD                  |
|                  | C18:1-OH           | < LOD                  |                      | PC aa C40:1        | < LOD                  |
|                  | C5-OH (C3-DC-M)    | < LOD                  |                      | PC ae C30:2        | < LOD                  |
|                  | C3                 | < LOD                  |                      | PC ae C42:5        | < LOD                  |
|                  | C3-OH              | < LOD                  | Sphingolipids        | SM C22:3           | < LOD                  |
|                  | C3:1               | < LOD                  |                      | SM C26:0           | < LOD                  |
|                  | C5                 | < LOD                  |                      |                    |                        |
|                  | C5-DC (C6-OH)      | < LOD                  |                      |                    |                        |
|                  | C5-M-DC            | < LOD                  |                      |                    |                        |
|                  | C5:1               | < LOD                  |                      |                    |                        |
|                  | C5:1-DC            | < LOD                  |                      |                    |                        |
|                  | C6 (C4:1-DC)       | < LOD                  |                      |                    |                        |
|                  | C6:1               | < LOD                  |                      |                    |                        |
|                  | C7-DC              | < LOD                  |                      |                    |                        |
|                  | C8                 | < LOD                  |                      |                    |                        |
|                  | C9                 | < LOD                  |                      |                    |                        |

<sup>1</sup>Limit of detection (< LOD) and lower limit of quantification (< LLOQ).

**Supplementary Table S2.** Predefined ratios or sums of metabolites that can be selected for their potential metabolic significance.

| Metabolite ratio or sum <sup>1</sup> | Identifier                                                             | Description                                                                                                             |
|--------------------------------------|------------------------------------------------------------------------|-------------------------------------------------------------------------------------------------------------------------|
| (C2 + C3) / C0                       | Ratio of short chain acylcarnitines to free carnitine                  | Measure of overall $\beta$ -oxidation activity                                                                          |
| AAA                                  | Sum of aromatic amino acids                                            |                                                                                                                         |
| ADMA / Arg                           | Fraction of asymmetrically dimethylated Arg of the unmodified Arg pool | Inhibition of NO synthase, associated with endothelial dysfunction and cardiovascular risk in general                   |
| BCAA                                 | Sum of branched-chain amino acids                                      | Indicator of short term metabolic control (analogy with insulin muscular resistance)                                    |
| C2 / C0                              | Ratio of acetylcarnitine to free carnitine                             | Measure of $\beta$ -oxidation of even numbered fatty acids                                                              |
| Cit / Arg                            | Ratio of Cit to Arg                                                    | Activity of nitric oxide synthase                                                                                       |
| Cit / Orn                            | Ratio of Cit to Orn                                                    | Activity of ornithine carbamoylphosphate transferase                                                                    |
| CPT-1 ratio                          | Ratio of long chain acylcarnitines to free carnitine ([C16+C18]/C0)    | Activity of carnitine palmitoyl transferase 1, rate limiting step in the uptake of fatty acids into the mitochondria    |
| Essential AA                         | Sum of essential amino acids                                           | Indicator of nutritional status                                                                                         |
| Fischer ratio                        | Ratio of BCAA to AAA                                                   | Indicator of liver damage                                                                                               |
| Glucogenic AA                        | Sum of selected glucogenic amino acids (Ala, Gly, Ser)                 | Indicator of glycolytic vs. gluconeogenic activity                                                                      |
| Kynurenine / Trp                     | Ratio of Kynurenine to Trp                                             | Ratio of Trp degradation to kynurenine, indicator of indoleamine 2,3-dioxygenase activity (immunosuppression/tolerance) |
| Met-SO / Met                         | Fraction of sulfoxidized Met of unmodified Met pool                    | Measure of systemic oxidative stress                                                                                    |
| MUFA (PC)                            | Monounsaturated glycerophosphocholines                                 | Indicator of nutritional lipid content                                                                                  |
| MUFA (PC) / SFA (PC)                 | Ratio of monounsaturated to saturated glycerophosphocholines           | Measure of the activity of fatty acid desaturases and indicator of nutritional lipid content                            |
| Non-essential AA                     | Sum of non-essential amino acids                                       | Indicator of metabolic / catabolic state                                                                                |
| Orn / Arg                            | Ratio of Orn to Arg                                                    | Activity of arginase                                                                                                    |
| PUFA (PC)                            | Sum of polyunsaturated glycerophosphocholines                          | Indicator of nutritional lipid content                                                                                  |
| PUFA (PC) / SFA (PC)                 | Ratio of polyunsaturated to saturated glycerophosphocholines           | Measure of the activity of fatty acid desaturases and indicator of nutritional lipid content                            |
| Putrescine / Orn                     | Ratio of Putrescine / Orn                                              | Activity of ornithine decarboxylase                                                                                     |
| SDMA / Arg                           | Fraction of symmetrically dimethylated Arg of the unmodified Arg pool  | Indicator of impaired kidney function/renal failure                                                                     |
| Serotonin / Trp                      | Ratio of Serotonin to Trp                                              | Rate of Trp degradation to Serotonin                                                                                    |
| SFA (PC)                             | Sum of saturated glycerophosphocholines                                | Indicator of nutritional lipid composition                                                                              |
| Spermidine / Putrescine              | Ratio of Spermidine to Putrescine                                      | Activity of spermidine synthase                                                                                         |
| Spermine / Spermidine                | Ratio of Spermine to Spermidine                                        | Activity of spermine synthase                                                                                           |

|                               |                                                                                          |                                                  |
|-------------------------------|------------------------------------------------------------------------------------------|--------------------------------------------------|
| Total (PC+SM)                 | Sum of choline containing phospholipids                                                  |                                                  |
| Total AA                      | Sum of all amino acids                                                                   |                                                  |
| Total AC / C0                 | Ratio of esterified to free carnitine                                                    |                                                  |
| Total AC-DC / Total AC        | Fraction of dicarboxyacetylcarnitines of the total acylcarnitines                        | Indicators of $\omega$ -oxidation of fatty acids |
| Total AC-OH / Total AC        | Fraction of hydroxylated acylcarnitines of the total acylcarnitines                      |                                                  |
| Total DMA / Arg               | Fraction of dimethylated Arg of the unmodified Arg pool                                  | Activity of protein arginine methyl transferases |
| Total lysoPC                  | Sum of lysoglycerophosphocholines                                                        |                                                  |
| Total lysoPC / Total PC       | Ratio of lysoglycerophosphocholines to glycerophosphocholines                            | Indicator of phospholipase activity              |
| Total PC                      | Sum of glycerophosphocholines                                                            |                                                  |
| Total PC aa                   | Sum of diacyl-glycerophosphocholines                                                     |                                                  |
| Total PC ae                   | Sum of glycerophosphocholin plasmalogens                                                 |                                                  |
| Total SM                      | Sum of ceramide phosphocholines (sphingomyelins)                                         |                                                  |
| Total SM / Total (SM+PC)      | Fraction of ceramide phosphocholines (sphingomyelins) / of total phospholipid pool       |                                                  |
| Total SM / Total PC           | Ratio of total ceramide phosphocholines (sphingomyelins) to total glycerophosphocholines |                                                  |
| Total SM-non-OH               | Sum of non-hydroxylated ceramide phosphocholines (sphingomyelins)                        |                                                  |
| Total SM-OH                   | Sum of hydroxylated ceramide phosphocholines (sphingomyelins)                            |                                                  |
| Total SM-OH / Total SM-non-OH | Ratio of hydroxylated to non-hydroxylated ceramide phosphocholines (sphingomyelins)      |                                                  |
| Tyr / Phe                     | Ratio of Tyr to Phe                                                                      | Activity of phenylalanine hydroxylase            |

<sup>1</sup>From the manufacturer's manual, Biocrates UM-RatioExplorer-1

**Supplementary Table S3.** Litter characteristics at birth, of sows fed low (LP-HC; 1:10.4), high (HP-LC; 1:1.3), or adequate (AP; 1:5) protein to carbohydrate ratio diets during pregnancy.

| Parameter                                        | Maternal diet            |                          |                            |
|--------------------------------------------------|--------------------------|--------------------------|----------------------------|
|                                                  | AP                       | LP-HC                    | HP-LC                      |
| <i>Number of litters</i>                         | 17                       | 16                       | 18                         |
| <i>Number of piglets</i>                         | 197                      | 167                      | 196                        |
| Litter size at birth                             | 12.1 ± 0.59              | 13.0 ± 0.60              | 11.7 ± 0.57                |
| Stillborn                                        | 0.77 ± 0.20              | 0.75 ± 0.21              | 0.44 ± 0.19                |
| Live born females, <i>per litter</i>             | 6.94 ± 0.58              | 6.19 ± 0.59              | 5.39 ± 0.56                |
| Live born males, <i>per litter</i>               | 4.94 ± 0.66              | 6.81 ± 0.68              | 6.11 ± 0.64                |
| Total live born                                  | 11.4 ± 0.56              | 12.3 ± 0.57              | 11.3 ± 0.54                |
| Body weight, <i>kg</i>                           |                          |                          |                            |
| Litter (total)                                   | 16.3 ± 0.65              | 15.0 ± 0.67              | 14.4 ± 0.63                |
| Piglet (average)                                 | 1.37 ± 0.04 <sup>a</sup> | 1.17 ± 0.04 <sup>b</sup> | 1.25 ± 0.04 <sup>a,b</sup> |
| Female (average)                                 | 1.34 ± 0.04 <sup>a</sup> | 1.15 ± 0.04 <sup>b</sup> | 1.21 ± 0.04 <sup>a,b</sup> |
| Males (average)                                  | 1.43 ± 0.05 <sup>a</sup> | 1.17 ± 0.05 <sup>b</sup> | 1.28 ± 0.05 <sup>a,b</sup> |
| Live born (average)                              | 1.38 ± 0.04 <sup>a</sup> | 1.19 ± 0.04 <sup>b</sup> | 1.25 ± 0.04 <sup>a,b</sup> |
| Average crown-rump length, <i>cm</i>             |                          |                          |                            |
| Female                                           | 26.9 ± 1.24              | 25.8 ± 1.28              | 23.6 ± 1.20                |
| Males                                            | 27.3 ± 1.27              | 25.9 ± 1.31              | 23.8 ± 1.23                |
| Intra-litter variability, <i>kg</i> <sup>2</sup> | 0.20 ± 0.01              | 0.21 ± 0.02              | 0.21 ± 0.01                |

<sup>1</sup>Values are LSmeans ± SE; Labeled LSmeans (a, b  $p < 0.05$ ) without a common letter differ within a row.

<sup>2</sup>Intra-litter variability of birth weight was calculated as square root of the pooled litter variance of male and female piglets within each litter (8).

**Supplementary Table S4.** Statistically non-significant ( $p > 0.05$ ) body weight measurements, from weaning (28 d) to 56 d (prior to catheter implantation) measured in juvenile age class 80 d porcine offspring exposed to low (LP-HC; 1:10.4,  $n = 25$ ), high (HP-LC; 1:1.3,  $n = 27$ ), or adequate (AP; 1:5,  $n = 25$ ) protein to carbo-hydrate ratio diets during gestation. Values are LSmeans  $\pm$  SE.

| Parameter       | Age (d) | Maternal diet <sup>1</sup> |                 |                 |
|-----------------|---------|----------------------------|-----------------|-----------------|
|                 |         | AP                         | LP-HC           | HP-LC           |
| Body weight, kg | 28      | 7.62 $\pm$ 0.37            | 8.31 $\pm$ 0.33 | 7.85 $\pm$ 0.46 |
|                 | 35      | 8.50 $\pm$ 0.41            | 8.95 $\pm$ 0.36 | 8.30 $\pm$ 0.50 |
|                 | 42      | 11.0 $\pm$ 0.47            | 11.3 $\pm$ 0.42 | 10.6 $\pm$ 0.59 |
|                 | 49      | 14.7 $\pm$ 0.55            | 14.7 $\pm$ 0.49 | 13.8 $\pm$ 0.70 |
|                 | 56      | 19.0 $\pm$ 0.57            | 18.6 $\pm$ 0.51 | 17.1 $\pm$ 0.77 |

<sup>1</sup>Number of animals; AP = 27; LP-HC = 25; HP-LC = 26.

**Supplementary Table S5.** Birth weight, plasma and serum biochemical parameters of 1 and 80 d old porcine offspring exposed to low (LP-HC; 1:10.4), high (HP-LC; 1:1.3), or adequate (AP; 1:5) protein to carbohydrate ratio diets during gestation. Values are LSmeans  $\pm$  SE.

| Parameters                   | Age class  | Maternal diet <sup>1</sup> |             |             | <i>P</i> value, $\leq^2$ |
|------------------------------|------------|----------------------------|-------------|-------------|--------------------------|
|                              |            | AP                         | LP-HC       | HP-LC       | Age class                |
| <b>Body weight, kg</b>       |            |                            |             |             |                          |
| Birth                        | 1 and 80 d | 1.34 ± 0.04                | 1.21 ± 0.04 | 1.23 ± 0.04 | 0.93                     |
| <b>Metabolites</b>           |            |                            |             |             |                          |
| Glucose,                     | 1 d        | 5.18 ± 0.26                | 4.94 ± 0.25 | 5.62 ± 0.25 | 0.06                     |
| mmol/L                       | 80 d       | 5.57 ± 0.28                | 5.74 ± 0.29 | 5.68 ± 0.28 |                          |
| NEFA,                        | 1 d        | 242 ± 39                   | 194 ± 38    | 285 ± 37    | 0.53                     |
| μmol/L                       | 80 d       | 269 ± 40                   | 292 ± 42    | 221 ± 41    |                          |
| HDL cholesterol,             | 1 d        | 0.83 ± 0.09                | 0.91 ± 0.08 | 0.95 ± 0.11 | 0.08                     |
| mmol/L                       | 80 d       | 1.23 ± 0.10                | 1.06 ± 0.10 | 0.88 ± 0.14 |                          |
| LDL cholesterol,             | 1 d        | 1.13 ± 0.24                | 1.42 ± 0.20 | 0.94 ± 0.29 | 0.19                     |
| mmol/L                       | 80 d       | 1.41 ± 0.23                | 1.43 ± 0.23 | 1.48 ± 0.30 |                          |
| Total cholesterol,           | 1 d        | 2.14 ± 0.15                | 2.36 ± 0.15 | 2.47 ± 0.15 | 0.02                     |
| mmol/L                       | 80 d       | 2.61 ± 0.16                | 2.59 ± 0.17 | 2.66 ± 0.16 |                          |
| <b>Ratios</b>                |            |                            |             |             |                          |
| Glucose:Insulin <sup>3</sup> | 1 d        | 0.25 ± 0.04                | 0.31 ± 0.04 | 0.18 ± 0.03 | 0.07                     |
|                              | 80 d       | 0.21 ± 0.05                | 0.17 ± 0.05 | 0.18 ± 0.05 |                          |

<sup>1</sup>Number of animals; Age class 1 d (AP = 46–53; LP-HC = 47–49; HP-LC = 51–58), except for HDL and LDL cholesterol (AP = 21–23; LP-HC = 28; HP-LC = 15–18). Age class 80 d (AP = 24–27; LP-HC = 23–25; HP-LC = 22–26), except for HDL and LDL cholesterol (AP = 14; LP-HC = 14; HP-LC = 7).

<sup>2</sup>ANOVA F-Test.

<sup>3</sup>mmol/pmol.

**Supplementary Table S6.** Body weight, IVGTT analytes, glucose turnover and pools of 68 d old porcine offspring exposed to low (LP-HC; 1:10.4), high (HP-LC; 1:1.3), or adequate (AP; 1:5) protein to carbohydrate ratio diets during gestation. Values are LSmeans  $\pm$  SE.

| Parameter                                   | Maternal diet <sup>1</sup> |                  |                  |
|---------------------------------------------|----------------------------|------------------|------------------|
|                                             | AP                         | LP-HC            | HP-LC            |
| <i>Number of piglets</i>                    | 27                         | 25               | 27               |
| Body weight, <i>kg</i>                      | 22.8 $\pm$ 0.63            | 22.7 $\pm$ 0.56  | 20.7 $\pm$ 0.82  |
| Fasting                                     |                            |                  |                  |
| Glucagon, <i>pg/mL</i>                      | 0.02 $\pm$ 0.002           | 0.02 $\pm$ 0.001 | 0.02 $\pm$ 0.002 |
| Glucose, <i>mmol/L</i>                      | 5.83 $\pm$ 0.11            | 5.84 $\pm$ 0.10  | 5.69 $\pm$ 0.15  |
| Insulin, $\mu$ <i>U/mL</i>                  | 0.36 $\pm$ 0.06            | 0.35 $\pm$ 0.05  | 0.44 $\pm$ 0.08  |
| AUC                                         |                            |                  |                  |
| Glucose (2-30 min), <i>mmol/L · min</i>     | 59.7 $\pm$ 3.18            | 56.4 $\pm$ 2.80  | 66.6 $\pm$ 4.38  |
| Insulin (0-30 min), $\mu$ <i>U/mL · min</i> | 434 $\pm$ 53               | 469 $\pm$ 47     | 550 $\pm$ 73     |
| Glucose turnover, <i>g / kg BW / day</i>    | 15.0 $\pm$ 1.29            | 14.3 $\pm$ 1.13  | 14.4 $\pm$ 1.78  |
| Glucose pool, <i>mg / kg BW</i>             | 426 $\pm$ 9                | 437 $\pm$ 8      | 431 $\pm$ 13     |

<sup>1</sup>Sex composition (AP; female = 17, male = 10, LP-HC; female = 12, male 13, HP-LC; female = 10, male = 17).

**Supplementary Table S7.** Body weight, urea turnover and pool of 76 d old porcine offspring exposed to low (LP-HC; 1:10.4), high (HP-LC; 1:1.3), or adequate (AP; 1:5) protein to carbohydrate ratio diets during gestation. Values are LSmeans  $\pm$  SE.

| Parameter                       | Maternal diet <sup>1</sup> |                 |                 |
|---------------------------------|----------------------------|-----------------|-----------------|
|                                 | AP                         | LP-HC           | HP-LC           |
| <i>Number of piglets</i>        | 27                         | 25              | 27              |
| Body weight, kg                 | 25.8 $\pm$ 0.73            | 25.9 $\pm$ 0.65 | 23.7 $\pm$ 0.93 |
| Urea pool, mg / kg BW           | 114 $\pm$ 11               | 117 $\pm$ 10    | 97 $\pm$ 15     |
| Urea turnover, mg / kg BW / day | 428 $\pm$ 47               | 448 $\pm$ 42    | 285 $\pm$ 59    |

<sup>1</sup> Sex composition (AP; female = 17, male = 10, LP-HC; female = 12, male 13, HP-LC; female = 10, male = 17)



**Supplementary Table S8.** Plasma targeted metabolite ratios and sums of porcine offspring exposed to low (LP-HC; 1:10.4), high (HP-LC; 1:1.3), or adequate (AP; 1:5) protein to carbohydrate ratio diets during gestation.

| Parameter <sup>3</sup>               | Age class | Maternal diet <sup>1</sup> |                           |                          | <i>p</i> value, $\leq^2$ |                |
|--------------------------------------|-----------|----------------------------|---------------------------|--------------------------|--------------------------|----------------|
|                                      |           | AP                         | LP-HC                     | HP-LC                    | Age class                | Diet*Age class |
| <i>Number of piglets / age class</i> |           | 8                          | 8                         | 8                        |                          |                |
| <b>Ratios</b>                        |           |                            |                           |                          |                          |                |
| C2 / C0                              | 1         | 0.28 ± 0.02 <sup>ac</sup>  | 0.21 ± 0.02 <sup>bc</sup> | 0.24 ± 0.02 <sup>c</sup> | <0.001                   | 0.03           |
|                                      | 80        | 0.10 ± 0.01 <sup>d</sup>   | 0.12 ± 0.02 <sup>d</sup>  | 0.10 ± 0.02 <sup>d</sup> |                          |                |
| Cit / Arg                            | 1         | 0.81 ± 0.09                | 0.83 ± 0.09               | 0.88 ± 0.09              | <0.001                   | 0.95           |
|                                      | 80        | 0.48 ± 0.09                | 0.52 ± 0.09               | 0.52 ± 0.09              |                          |                |
| Cit / Orn                            | 1         | 1.22 ± 0.13                | 1.32 ± 0.13               | 1.45 ± 0.13 <sup>c</sup> | <0.001                   | 0.24           |
|                                      | 80        | 0.88 ± 0.13                | 1.03 ± 0.13               | 0.74 ± 0.13 <sup>d</sup> |                          |                |
| Fischer's ratio                      | 1         | 1.27 ± 0.18 <sup>d</sup>   | 1.59 ± 0.18               | 1.26 ± 0.18 <sup>d</sup> | <0.001                   | 0.06           |
|                                      | 80        | 2.92 ± 0.18 <sup>c</sup>   | 2.35 ± 0.18               | 2.55 ± 0.18 <sup>c</sup> |                          |                |
| Orn / Arg                            | 1         | 0.65 ± 0.06                | 0.65 ± 0.06               | 0.62 ± 0.06              | <0.001                   | 0.19           |
|                                      | 80        | 0.56 ± 0.06                | 0.55 ± 0.06               | 0.72 ± 0.06              |                          |                |
| SDMA / Arg                           | 1         | 0.02 ± 0.01                | 0.04 ± 0.01 <sup>c</sup>  | 0.03 ± 0.01              | <0.001                   | 0.73           |
|                                      | 80        | 0.01 ± 0.01                | 0.01 ± 0.01 <sup>d</sup>  | 0.01 ± 0.01              |                          |                |
| Spermidine / Putrescine              | 1         | 0.14 ± 0.07                | 0.22 ± 0.07               | 0.18 ± 0.07              | 0.038                    | 0.99           |
|                                      | 80        | 0.27 ± 0.07                | 0.36 ± 0.07               | 0.30 ± 0.07              |                          |                |
| <b>Sums, (μM)</b>                    |           |                            |                           |                          |                          |                |
| Aromatic AA                          | 1         | 387 ± 32 <sup>c</sup>      | 284 ± 32                  | 382 ± 32 <sup>c</sup>    | <0.001                   | 0.10           |
|                                      | 80        | 177 ± 32 <sup>d</sup>      | 208 ± 32                  | 194 ± 32 <sup>d</sup>    |                          |                |
| Total SMOH                           | 1         | 8.45 ± 0.78                | 9.48 ± 0.78               | 8.74 ± 0.78              | 0.01                     | 0.39           |
|                                      | 80        | 11.5 ± 0.78                | 10.4 ± 0.78               | 10.4 ± 0.78              |                          |                |

<sup>1</sup>Values are LSmeans ± SE; Labelled LSmeans (<sup>a, b</sup>  $p < 0.05$ ) without a common letter differ within a row, (<sup>c, d</sup>  $p < 0.05$ ) without a common letter differ within a column, based on Tukey post hoc analysis.

<sup>2</sup>ANOVA F-Test.

<sup>3</sup>Only significantly different parameters are shown. Abbreviations; ratios of acetylcarnitine to free carnitine (C2 / C0), citrulline to arginine (Cit / Arg), citrulline to ornithine (Cit / Orn), ornithine to arginine (Orn / Arg), symmetric dimethylated Arg to unmodified Arg pool (SDMA / Arg); sums of hydroxylated ceramide phosphocholines (sphingomyelins) (Total-SMOH).

**Supplementary Figure S1.** Intravenous glucose tolerance test conducted at 68 days of life in juvenile porcine offspring exposed to low (LP-HC; 1:10.4,  $n = 25$ ), high (HP-LC; 1:1.3,  $n = 27$ ), or adequate (AP; 1:5,  $n = 25$ ) protein to carbohydrate ratio diets during gestation. Plasma concentrations of, **A** glucagon, and ratios of **B** glucose to insulin and **C** glucagon to insulin. Values are LSmeans  $\pm$  SE. Diet, Time and the interaction of Diet  $\times$  Time are ANOVA F-Test results.

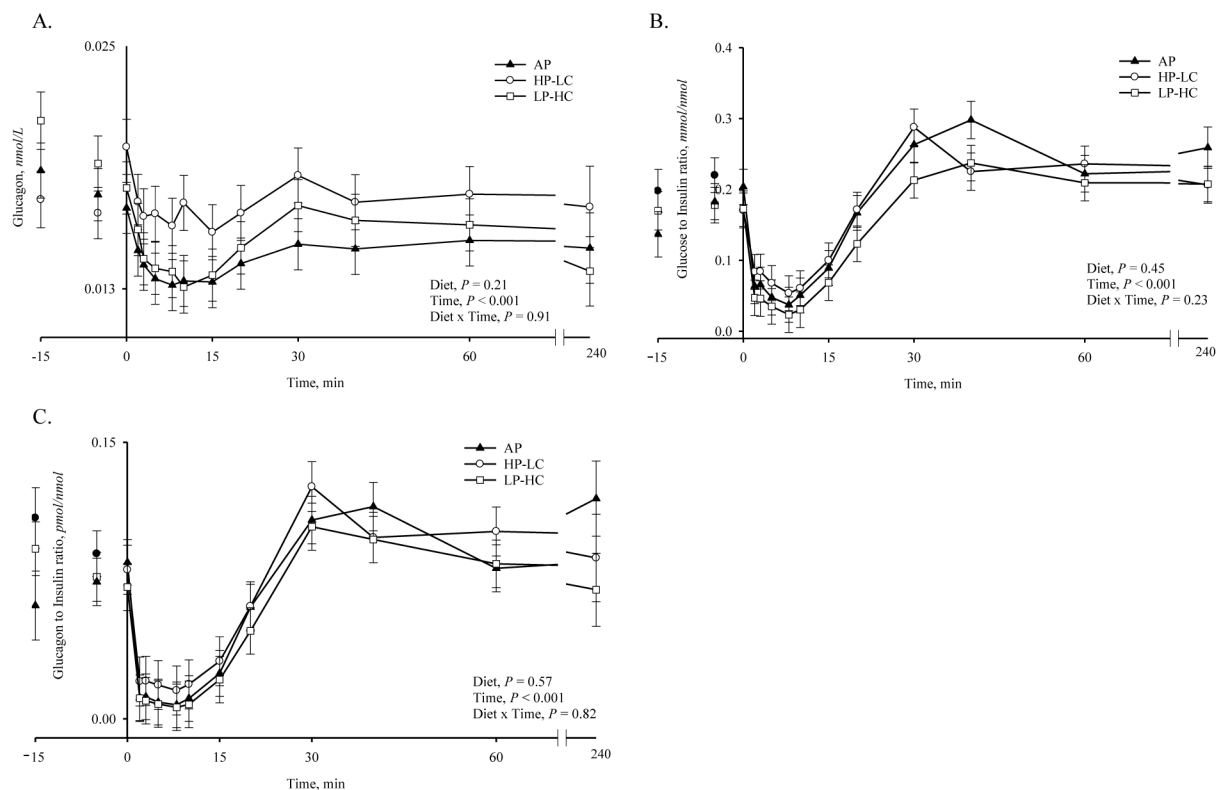

**Supplementary Figure S2.** Intravenous insulin challenge conducted in 71 day of juvenile porcine offspring exposed to low (LP-HC; 1:10.4), high (HP-LC; 1:1.3), or adequate (AP; 1:5) protein to carbohydrate ratio diets during gestation. Values are LSmeans  $\pm$  SE. Diet and the interaction of Diet  $\times$  Time are ANOVA F-Test results.

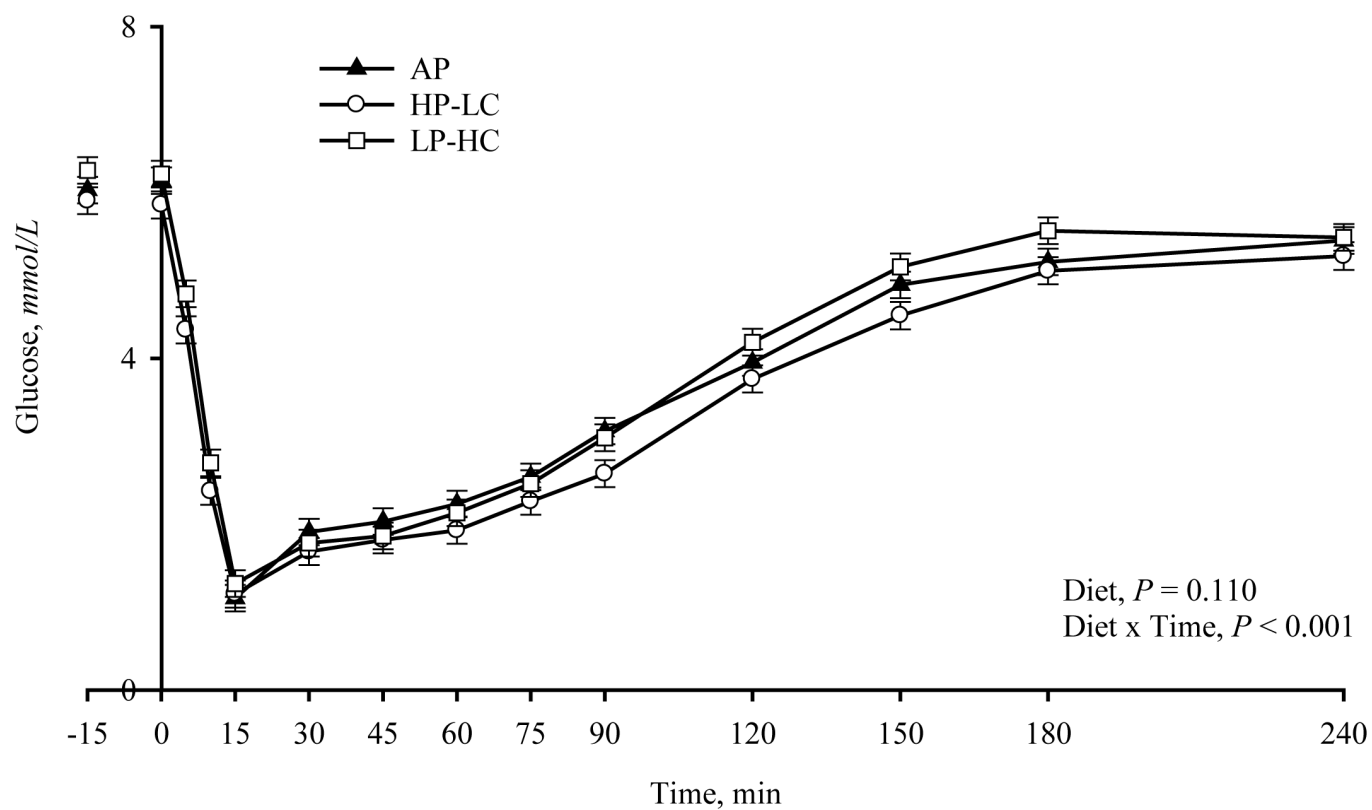

Supplement: s1 [file s1]
